# Supplementary material for: Fuel mediated solution combustion synthesis of ZnO supported gold clusters and nanoparticles and their catalytic activity and in vitro cytotoxicity
Source: Royal Society of Chemistry journal article supplement (doi:10.1039/c4cp03393k), 2014-01-01
Supplement: c4cp03393k1.pdf [file c4cp03393k1.pdf]

Supporting Information:

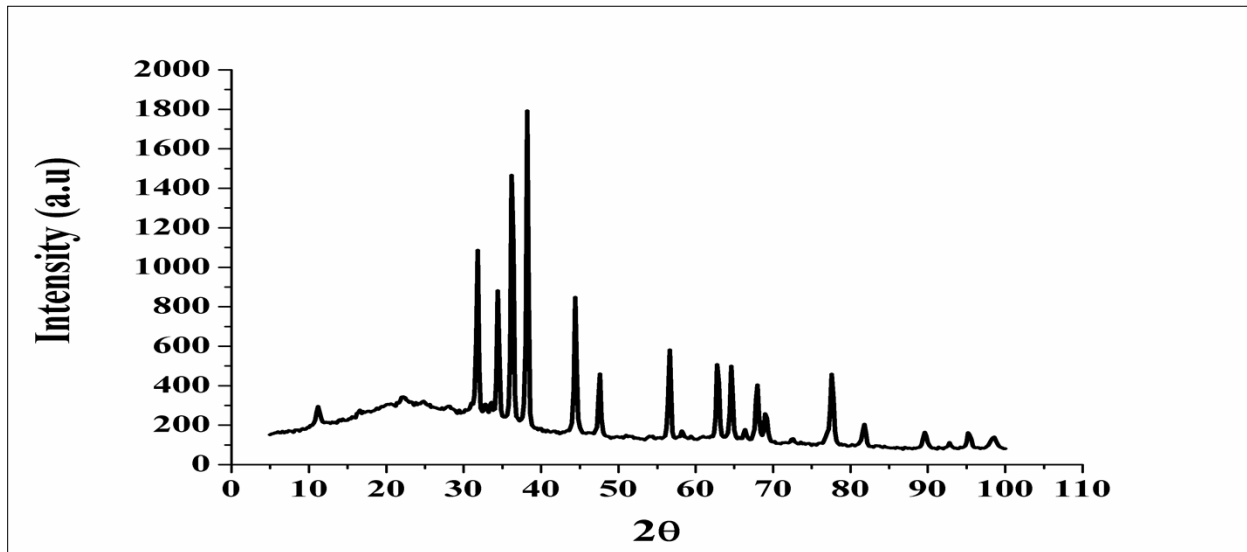

S1: X-Ray diffraction patterns of 5% Au-ZnO nanocomposites prepared at Zn/PEG ratio of 3.

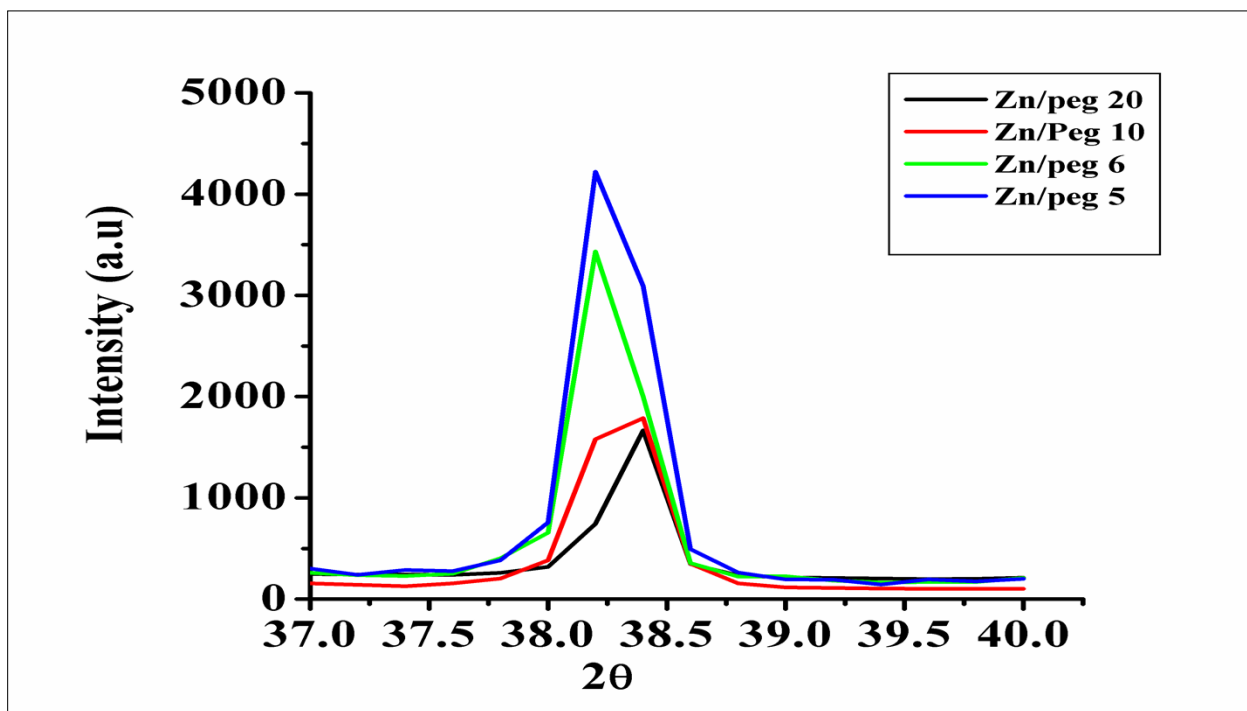

S2: X-Ray diffraction patterns of Au peak at  $2\theta = 38.2$  for 5% Au-ZnO nanocomposites prepared at different Zn/PEG ratio.

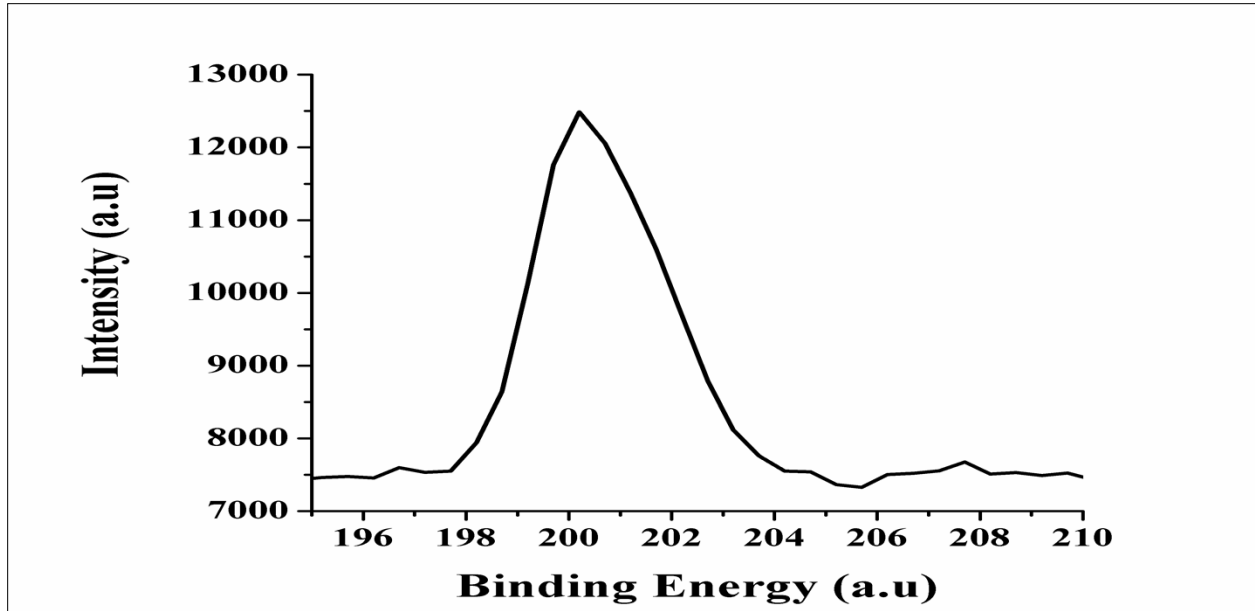

S3: Photoelectron spectrum of Cl 2p<sub>3/2</sub> for 5% Au-ZnO prepared at Zn/PEG ratio of 30.

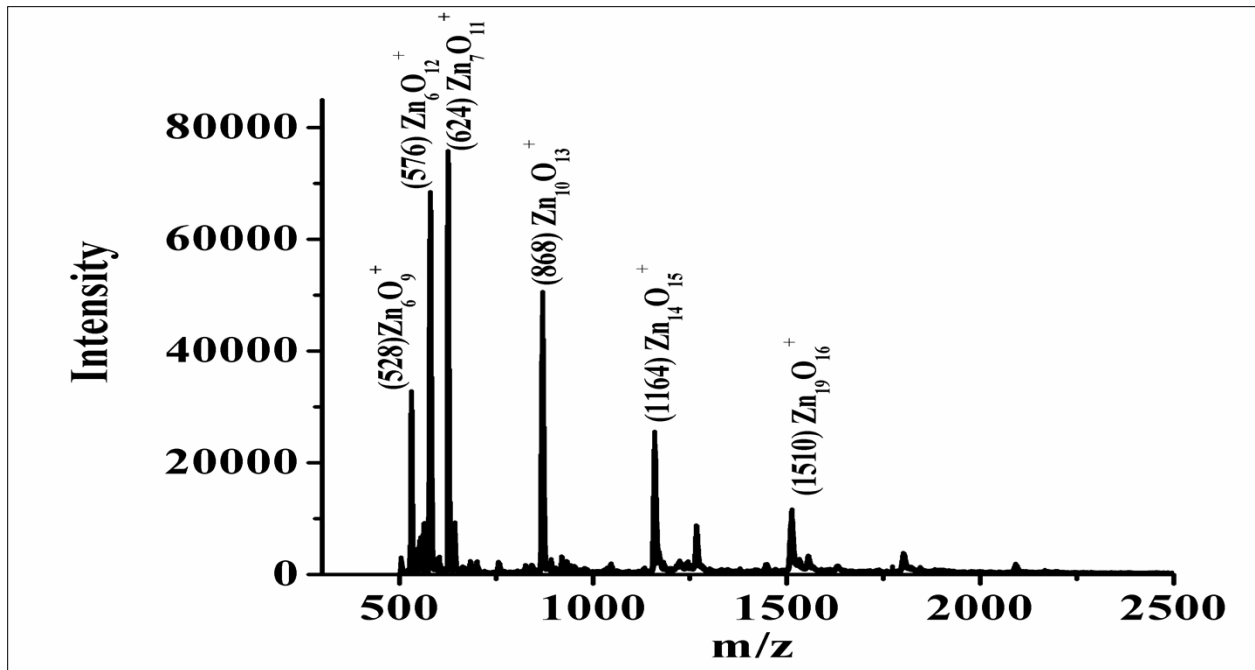

S4: MALDI-TOF of 0.5% Au-ZnO prepared at Zn/PEG ratio of 5.

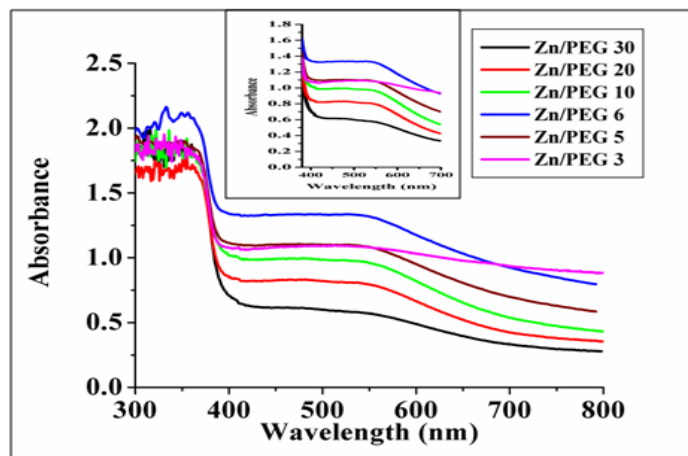

**S5. DRS UV-Vis spectra of 5% Au-ZnO at different Zn/PEG ratio.**

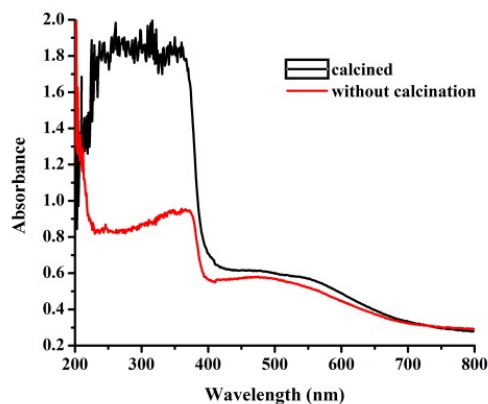

**S6. A comparative UV-Vis DRS of ZnO/Au from Zn/PEG ratio of 30 with 5% Au before and after calcination.**

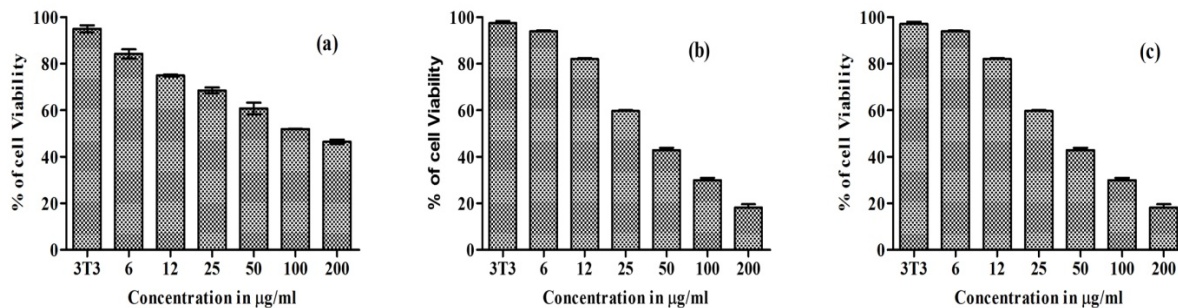

**S7. Percentage cell Toxicity of (a) Pure ZnO, (b) 1% Au/ZnO, (c) 5% Au with Same Zn/PEG ratio of 5 as a function of their concentration. 3T3 fibroblast cells used as normal control with a concentration of 250 µg/ml**

**T1: Intensity ratio of XRD pattern of AuClO with respect to Au (based on peak heights).**

| Zn/PEG ratio | AuClO, 2θ=12 | Au, 2θ= 38 | AuClO/Au |
|--------------|--------------|------------|----------|
| 30           | 416          | 2395       | 0.173*   |
| 20           | 276          | 1645       | 0.167    |
| 10           | 270          | 2206       | 0.122    |
| 6            | 383          | 3710       | 0.103    |
| 5            | 342          | 5715       | 0.059    |

- The value is much higher in precalcined samples, i.e. 0.6

**T2: Intensity ratio of various Au clusters as seen by MALDI-TOF of Au-ZnO nanocomposites.**

| Name of Samples | Zn/PEG | Intensity       |                 |                 |                 |                  | Au <sub>3</sub> /Au <sub>5</sub> | Au <sub>3</sub> /Au <sub>7</sub> | Au <sub>3</sub> /Au <sub>9</sub> | Au <sub>3</sub> /Au <sub>11</sub> |
|-----------------|--------|-----------------|-----------------|-----------------|-----------------|------------------|----------------------------------|----------------------------------|----------------------------------|-----------------------------------|
|                 |        | Au <sub>3</sub> | Au <sub>5</sub> | Au <sub>7</sub> | Au <sub>9</sub> | Au <sub>11</sub> |                                  |                                  |                                  |                                   |
| 1% Au-ZnO       | 30     | 7032            | 765             | 440             | 348             |                  | 9.19                             | 15.98                            | 20.21                            |                                   |
| 1% Au-ZnO       | 5      | 21279           | 7506            | 4858            | 1187            |                  | 2.83                             | 4.38                             | 17.92                            |                                   |
| 5% Au-ZnO       | 5      | 149413          | 39986           | 22574           | 20400           | 5940             | 3.73                             | 6.62                             | 7.32                             | 25.15                             |
| 5% Au-ZnO       | 6      | 127628          | 33514           | 17051           | 14992           | 6762             | 3.81                             | 7.48                             | 8.51                             | 18.87                             |
| 5% Au-ZnO       | 10     | 12273           | 4404            | 1888            | 987             |                  | 2.78                             | 6.51                             | 12.43                            |                                   |

**T3. A comparative chart of Percentage cell viability of ZnO nanoparticles against different cancer cells**

| S.No | Name of the Cell line | Cell quantity (cells/well) | Maximum Concentration of sample used | Percentage Cell Viability* | References                        |
|------|-----------------------|----------------------------|--------------------------------------|----------------------------|-----------------------------------|
| 1    | HepG2                 | 1 × 10 <sup>4</sup>        | 15 µg/mL                             | 39 (52.00)                 | Akhtar <i>et al.</i> (ref.55)     |
|      | A549                  | 1 × 10 <sup>4</sup>        | 15 µg/mL                             | 47 (62.67)                 |                                   |
|      | BEAS-2B               | 1 × 10 <sup>4</sup>        | 15 µg/mL                             | 33 (44.00)                 |                                   |
| 2    | HLaC 78               | 1 × 10 <sup>4</sup>        | 20 µg/mL                             | ~42 (42.00)                | Hackenberg <i>et al.</i> (ref.56) |
|      | UD-SCC 7A             | 1 × 10 <sup>4</sup>        | 20 µg/mL                             | ~50 (50.00)                |                                   |
|      | pOMCs                 | 1 × 10 <sup>4</sup>        | 20 µg/mL                             | ~48 (48.00)                |                                   |
| 3    | A549                  | 1 × 10 <sup>4</sup>        | 350 µg/mL                            | ~20 (**)                   | Chen <i>et al.</i> (ref.57)       |
| 4    | U87 cells             | 1 × 10 <sup>4</sup>        | 200 µg/mL                            | ~75 (**)                   | Wahab <i>et al.</i> (ref.58)      |
|      | HeLa                  | 1 × 10 <sup>4</sup>        | 200 µg/mL                            | ~79 (**)                   |                                   |
| 5    | MCF 7                 | 1 × 10 <sup>5</sup>        | 200 µg/mL                            | ~46                        | Present work                      |

\*Values in parenthesis normalized for a maximum of 200 µg/mL of nanoagents and constant cell quantity of 1 × 10<sup>5</sup> cells/well; \*\*cannot be calculated for pure ZnO efficacy due to lack of experimental data
